# Supplementary material for: ArchR is a scalable software package for integrative single-cell chromatin accessibility analysis
Source: PubMed Central journal article supplement (PMC8012210; doi:10.1038/s41588-021-00790-6), 2021-02-25
Supplement: 41588_2021_790_MOESM2_ESM.pdf [file 41588_2021_790_MOESM2_ESM.pdf]

## Reporting Summary

Nature Research wishes to improve the reproducibility of the work that we publish. This form provides structure for consistency and transparency in reporting. For further information on Nature Research policies, see [Authors & Referees](#) and the [Editorial Policy Checklist](#).

### Statistics

For all statistical analyses, confirm that the following items are present in the figure legend, table legend, main text, or Methods section.

n/a Confirmed

- The exact sample size ( $n$ ) for each experimental group/condition, given as a discrete number and unit of measurement
- A statement on whether measurements were taken from distinct samples or whether the same sample was measured repeatedly
- The statistical test(s) used AND whether they are one- or two-sided  
*Only common tests should be described solely by name; describe more complex techniques in the Methods section.*
- A description of all covariates tested
- A description of any assumptions or corrections, such as tests of normality and adjustment for multiple comparisons
- A full description of the statistical parameters including central tendency (e.g. means) or other basic estimates (e.g. regression coefficient) AND variation (e.g. standard deviation) or associated estimates of uncertainty (e.g. confidence intervals)
- For null hypothesis testing, the test statistic (e.g.  $F$ ,  $t$ ,  $r$ ) with confidence intervals, effect sizes, degrees of freedom and  $P$  value noted  
*Give  $P$  values as exact values whenever suitable.*
- For Bayesian analysis, information on the choice of priors and Markov chain Monte Carlo settings
- For hierarchical and complex designs, identification of the appropriate level for tests and full reporting of outcomes
- Estimates of effect sizes (e.g. Cohen's  $d$ , Pearson's  $r$ ), indicating how they were calculated

*Our web collection on [statistics for biologists](#) contains articles on many of the points above.*

### Software and code

Policy information about [availability of computer code](#)

Data collection

Cell Ranger 1.0.0 – Barcode Identification, Alignment, Filter, Deduplication

Data analysis

Code Availability and Documentation

Extensive documentation and a full user manual are available at [www.ArchRProject.com](http://www.ArchRProject.com). The software is open-source and all code can be found on GitHub at <https://github.com/GreenleafLab/ArchR>. Additionally, code for producing the majority of analyses from this paper is available at the publication page [https://github.com/GreenleafLab/ArchR\\_2020](https://github.com/GreenleafLab/ArchR_2020).

Software Package and Associated Packages Versions

macs2 2.1.1.20160309 – Peak Calling

R version 3.6.1 – R environment for all custom code

ArchR - 0.2.1 - Software for analysis of scATAC-seq data.

rhdf5 - 2.30.1 - Software for HDF5 formatted analysis.

Irlba 2.3.3 – Running PCA/SVD on large matrices.

Rcpp 1.0.4 – Used for writing helpful C++ code to speed up operations.

Rtsne 0.15 – Used for t-SNE embeddings.

matrixStats 0.56.0 – Used for mathematical operations on large matrices.

cicero 1.4.2 – Used for calculating gene activity scores with Co-Accessibility.

chromVAR\_1.8.0 – Calculating TF deviation scores which can be associated with TF activity.

SummarizedExperiment 1.16.1 – R Data Class Environment used throughout analyses.

Motifmatchr 1.8.0 – Matching TF Motifs within peak regions

Seurat\_3.1.2 – SNN Graph Clustering Implementation

GenomicRanges 1.38.0 - Genomic Ranges Operations used for overlap analyses

Matrix 1.2-14 – Sparse Matrix math implementations.

BSgenome 1.54.0 – Toolkit used for getting Genomic DNA sequences for motif matching and footprinting.

Rsamtools 2.2.3 – For manipulating BAM files within R.  
uwot-0.1.5 - For creating UMAPs in R.

For manuscripts utilizing custom algorithms or software that are central to the research but not yet described in published literature, software must be made available to editors/reviewers. We strongly encourage code deposition in a community repository (e.g. GitHub). See the Nature Research [guidelines for submitting code & software](#) for further information.

## Data

Policy information about [availability of data](#)

All manuscripts must include a [data availability statement](#). This statement should provide the following information, where applicable:

- Accession codes, unique identifiers, or web links for publicly available datasets
- A list of figures that have associated raw data
- A description of any restrictions on data availability

### Data Availability

Bulk and scATAC-seq data from the cell line mixing experiment are available through GEO accession number GSE162690. All other scATAC-seq data used were from publicly available sources as outlined in Supplementary Table 1. We additionally have made available other analysis files on our publication page [https://github.com/GreenleafLab/ArchR\\_2020](https://github.com/GreenleafLab/ArchR_2020).

## Field-specific reporting

Please select the one below that is the best fit for your research. If you are not sure, read the appropriate sections before making your selection.

- Life sciences       Behavioural & social sciences       Ecological, evolutionary & environmental sciences

For a reference copy of the document with all sections, see [nature.com/documents/nr-reporting-summary-flat.pdf](https://nature.com/documents/nr-reporting-summary-flat.pdf)

## Life sciences study design

All studies must disclose on these points even when the disclosure is negative.

- Sample size: Sample size was set to make sure results were consistently reproducible. For computational benchmarking, we performed each analysis in triplicate. When possible, we included multiple replicates of scATAC-seq data sets to ensure fidelity in the analysis.
- Data exclusions: No data were excluded from the manuscript.
- Replication: All computational results presented in manuscript were reliably reproduced in triplicate. When possible, we included multiple replicates of scATAC-seq data sets to ensure fidelity in the analysis.
- Randomization: No randomization was used because analyses were performed mostly on previously published data sets.
- Blinding: No blinding was used because analyses were performed mostly on previously published data sets.

## Reporting for specific materials, systems and methods

We require information from authors about some types of materials, experimental systems and methods used in many studies. Here, indicate whether each material, system or method listed is relevant to your study. If you are not sure if a list item applies to your research, read the appropriate section before selecting a response.

### Materials & experimental systems

- | n/a                                 | Involved in the study                                     |
|-------------------------------------|-----------------------------------------------------------|
| <input checked="" type="checkbox"/> | <input type="checkbox"/> Antibodies                       |
| <input type="checkbox"/>            | <input checked="" type="checkbox"/> Eukaryotic cell lines |
| <input checked="" type="checkbox"/> | <input type="checkbox"/> Palaeontology                    |
| <input checked="" type="checkbox"/> | <input type="checkbox"/> Animals and other organisms      |
| <input checked="" type="checkbox"/> | <input type="checkbox"/> Human research participants      |
| <input checked="" type="checkbox"/> | <input type="checkbox"/> Clinical data                    |

### Methods

- | n/a                                 | Involved in the study                           |
|-------------------------------------|-------------------------------------------------|
| <input checked="" type="checkbox"/> | <input type="checkbox"/> ChIP-seq               |
| <input checked="" type="checkbox"/> | <input type="checkbox"/> Flow cytometry         |
| <input checked="" type="checkbox"/> | <input type="checkbox"/> MRI-based neuroimaging |

## Eukaryotic cell lines

Policy information about [cell lines](#)

- Cell line source(s): Jurkat, THP1, K562, HeLa, HEK-293T, HT1080, T24, MCF7, MCF10A from ATCC; GM12878 from Coriell
- Authentication: Cell lines were obtained directly from the listed provider and used shortly thereafter.

Mycoplasma contamination

All cell lines tested negative for mycoplasma contamination prior to use in experiments.

Commonly misidentified lines  
(See [ICLAC](#) register)

None of the cell lines used in this study are listed in this database.
